# Supplementary material for: Prioritising Climate Change Mitigation Behaviours and Exploring Public Health Co-Benefits: A Delphi Study
Source: MDPI journal article supplement (doi:10.3390/ijerph20065094), 2023-03-14
Supplement: s1 [file s1]

## **SUPPLEMENTARY MATERIALS**

### **S1. Round 1: 37 climate change mitigation behaviours**

#### **Heat**

- Install double/triple glazing
- Install cavity wall insulation
- Connect to District Heat Network (DHN)
- Install solid wall insulation
- Install Thermostatic Radiator Valves (TRVs)
- Take up a service-based heat proposition
- Reduce thermostat temperature
- Reduce number of rooms heated
- Heat for fewer hours of the day
- Cooling house by opening windows
- Rinsing the dishes and washing hands in cold water
- Cooking shorter meals or meals in bulk

#### **Transport**

- Reduce number of air miles
- Plug in electric vehicle (EV) whenever possible and accept smart charging
- Walk or cycle to school
- Buying and using a smaller car
- Reducing number of cars per household
- Combining trips
- Living closer to work and amenities
- Fewer holidays
- Extending how long a car is used for

#### **Electricity**

- Install LED lighting

- Buy smart-ready appliances
- Switch to time-of-use tariff
- Charging EV at home (smart charging, V2G, etc)
- Wait for a full load before using washing machine
- Doing dishes by hand
- Buying a smaller refrigerator

### **Consumption**

- Reducing waste food
- Buy sustainable products
- Consumers buy on strength of companies/manufacturers carbon footprint
- Eat healthy/eat more fruit and veg

### **Non-sectoral/Societal Change**

- Improving home workspace
- Transition to digital working
- Looking for jobs in a new green economy
- Looking for jobs closer to home
- Informed property purchasing

## **S2. Target behaviour discussion questions**

### **Questions**

- If you were able to conduct research on these behaviours for a year, which behaviour/behaviours would you want to focus resources on?
  - *Why is the behaviour important?*
  - *What do you think the relationship is between climate change behaviours and health-related impacts?*
  - *What are the barriers and facilitators for the behaviour?*
- If you were able to conduct research on these behaviours for a year what would you like to see happen?
- What existing work are you aware of?
  - *Can you identify any existing interventions that address the target behaviours?*
  - *What are the key outcomes of interventions?*
  - *What interventions haven't been tested/evaluated?*
  - *Can we identify/assess an intervention's capacity to produce long-term behaviour change?*
